# Supplementary material for: Synergistic effect of Mn on bandgap fluctuations and surface electrical characteristics in Ag-based Cu2ZnSn(S,Se)4 solar cells
Source: Royal Society of Chemistry journal article supplement (doi:10.1039/d0ta10103f), 2020-12-16
Supplement: d0ta10103f1.pdf [file d0ta10103f1.pdf]

Supporting information

**Synergistic Effect of Mn on Bandgap Fluctuations and Surface  
Electrical Characteristics in Ag-based  $\text{Cu}_2\text{ZnSn}(\text{S},\text{Se})_4$  Solar Cells**

Yafang Qi,\* Xiaoyue Zhao, Yao Liu, Dongxing Kou, Wenhui Zhou, Zhengji Zhou,  
Shengjie Yuan, Yuena Meng, and Sixin Wu\*

The Key Laboratory for Special Functional Materials of MOE, School of Materials  
Science and Engineering, National & Local Joint Engineering Research Center for  
High-efficiency Display and Lighting Technology, Collaborative Innovation Center  
of Nano Functional Materials and Applications, Henan University, Kaifeng 475004,  
China.

Email: qiyafang@henu.edu.cn; wusixin@henu.edu.cn

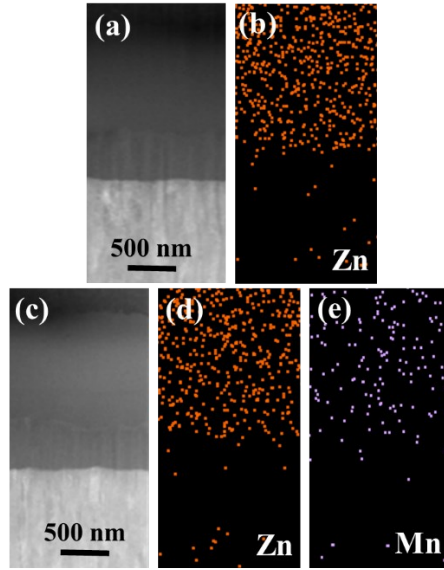

Fig. S1 TEM/EELS analysis of the CAZTSSe-based thin films. The high-angle annular dark field (HAADF) survey images of the S-Ref sample (a) and the S-10 sample (c). The qualitative elemental EELS maps of Zn and Mn elements for the S-Ref sample (b) and the S-10 sample (d, e), respectively.

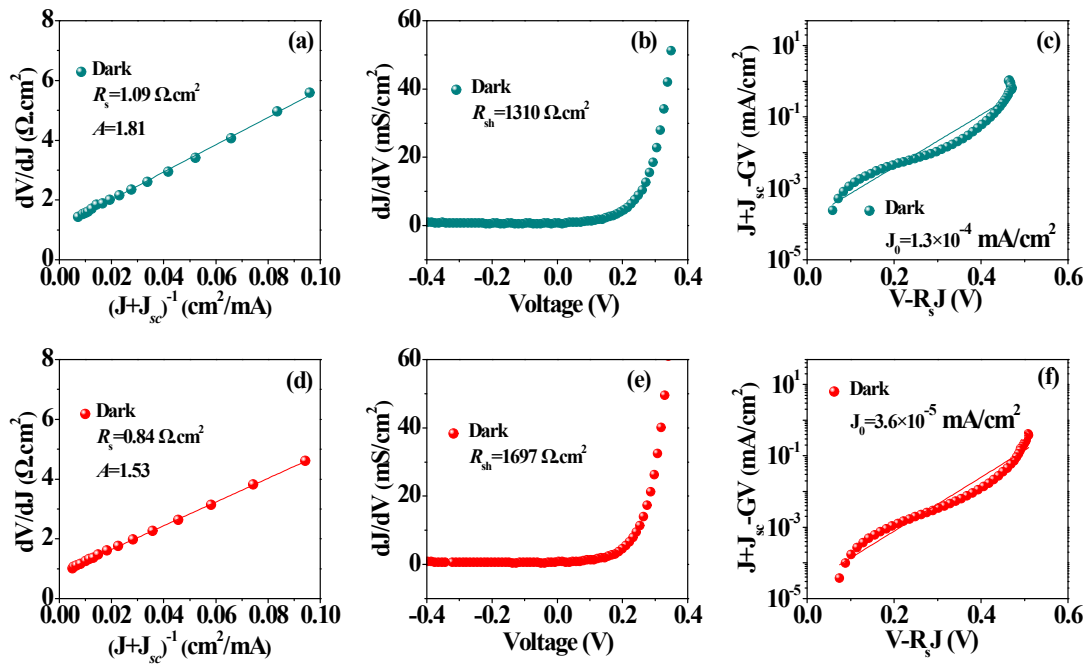

Fig. S2 Calculation of the diode parameters for the champion S-Ref and S-10 solar cells on the basis of dark  $J$ - $V$  curves: (a-c) S-Ref sample and (d-f) S-10 sample. (a, d) series resistance  $R_s$  and diode quality factor  $A$ , (b, e) shunt resistance  $R_{sh}$ , (c, f) the reverse saturation current density  $J_0$ .

Table S1. Summary of the photovoltaic parameters for  $(\text{Cu}_{0.95}\text{Ag}_{0.05})_2(\text{Zn}_{1-x}\text{Mn}_x)\text{Sn}(\text{S},\text{Se})_4$  solar cells with different Mn content ( $x=0.0-0.25$ ). The data are the average values calculated from 20 devices with standard deviation.

| Sample | $V_{oc}$ (mV) | $J_{sc}$ (mA/cm <sup>2</sup> ) | Fill Factor (%) | Efficiency (%) |
|--------|---------------|--------------------------------|-----------------|----------------|
| S-Ref  | 444.4±9.1     | 35.50±0.60                     | 62.67±1.06      | 9.90±0.32      |
| S-5    | 459.1±7.2     | 36.50±0.59                     | 64.21±0.72      | 10.76±0.31     |
| S-10   | 469.2±7.7     | 37.31±0.55                     | 64.48±0.77      | 11.29±0.34     |
| S-15   | 450.8±5.7     | 35.84±0.54                     | 62.76±0.55      | 10.14±0.23     |
| S-20   | 411.0±4.8     | 34.02±0.47                     | 52.74±0.64      | 7.38±0.19      |
| S-25   | 380.1±5.2     | 32.33±0.41                     | 41.43±0.44      | 5.08±0.14      |

Table S2. The detailed ICP data of selenized S-Ref sample. The average values are calculated from 5 samples.

| Sample  | Cu    | Ag    | Zn    | Sn    | Se    | (Cu+Ag)/<br>(Zn+Sn) | Zn/Sn |
|---------|-------|-------|-------|-------|-------|---------------------|-------|
| S1      | 0.95  | 0.048 | 0.681 | 0.547 | 1.991 | 0.813               | 1.245 |
| S2      | 0.947 | 0.046 | 0.678 | 0.552 | 1.986 | 0.807               | 1.228 |
| S3      | 0.948 | 0.051 | 0.675 | 0.55  | 2.015 | 0.816               | 1.227 |
| S4      | 0.946 | 0.05  | 0.682 | 0.545 | 2.007 | 0.812               | 1.251 |
| S5      | 0.952 | 0.049 | 0.679 | 0.544 | 2.004 | 0.818               | 1.248 |
| Average | 0.949 | 0.049 | 0.679 | 0.548 | 2.001 | 0.813               | 1.240 |

Table S3. The detailed ICP data of selenized S-10 sample. The average values are calculated from 5 samples.

| Sample  | Cu    | Ag    | Zn    | Mn    | Sn    | Se    | (Cu+Ag)/<br>(Zn+Mn+Sn) | (Zn+Mn)/<br>Sn | Mn/<br>(Mn+Zn) |
|---------|-------|-------|-------|-------|-------|-------|------------------------|----------------|----------------|
| S1      | 0.952 | 0.052 | 0.612 | 0.068 | 0.551 | 2.017 | 0.816                  | 1.234          | 0.100          |
| S2      | 0.948 | 0.05  | 0.61  | 0.067 | 0.545 | 1.995 | 0.817                  | 1.242          | 0.099          |
| S3      | 0.949 | 0.049 | 0.608 | 0.069 | 0.548 | 1.984 | 0.815                  | 1.235          | 0.102          |
| S4      | 0.947 | 0.051 | 0.613 | 0.068 | 0.549 | 2.011 | 0.811                  | 1.240          | 0.100          |
| S5      | 0.951 | 0.047 | 0.607 | 0.068 | 0.543 | 2.006 | 0.819                  | 1.243          | 0.101          |
| Average | 0.949 | 0.050 | 0.610 | 0.068 | 0.547 | 2.003 | 0.816                  | 1.239          | 0.100          |

Table S4. The detailed lattice constants of S-Ref sample. The average values are calculated from 5 samples with standard deviation.

| Sample                         | S1    | S2     | S3     | S4     | S5     | Average |              |
|--------------------------------|-------|--------|--------|--------|--------|---------|--------------|
| Lattice constant<br>calculated | a (Å) | 5.671  | 5.673  | 5.662  | 5.657  | 5.670   | 5.667±0.007  |
|                                | c (Å) | 11.319 | 11.320 | 11.310 | 11.323 | 11.315  | 11.317±0.005 |

Table S5. The detailed lattice constants of S-10 sample. The average values are calculated from 5 samples with standard deviation.

| Sample           |       | S1     | S2     | S3     | S4     | S5     | Average      |
|------------------|-------|--------|--------|--------|--------|--------|--------------|
| Lattice constant | a (Å) | 5.686  | 5.681  | 5.692  | 5.695  | 5.683  | 5.687±0.006  |
| calculated       | c (Å) | 11.326 | 11.323 | 11.329 | 11.333 | 11.327 | 11.328±0.004 |
